# Supplementary material
Source: Springer Nature journal article supplement (https://www.springermedizin.de/resource/supplementary/12874_2013_1055_MOESM2_ESM.pdf/9433426)
Supplement: MOESM2 [file 9433426]

## **Total hits**

(Pubmed, Ovid Medline & Embase)

1<sup>st</sup> May 2012-11<sup>th</sup> September 2012

**n=1273**

## **Potentially eligible abstracts**

**n=89**

## **Included diagnostic reviews**

**n=65**

Without a meta-analysis (n=12)

With a meta-analysis (n=53)

## **Excluded**

**n=1184**

Ineligible titles (n=1058)

Conference abstracts (n=126)

## **Excluded after full text review**

**n=24**

Not diagnostic accuracy review (n=15)

Conference abstract (n=8)

IPD meta-analysis (n=1)
